# Supplementary material for: Antarctic krill peptide alleviates liver fibrosis via downregulating the secondary bile acid mediated NLRP3 signaling pathway
Source: Royal Society of Chemistry journal article supplement (doi:10.1039/d1fo04241f), 2022-01-01
Supplement: d1fo04241f1.pdf [file d1fo04241f1.pdf]

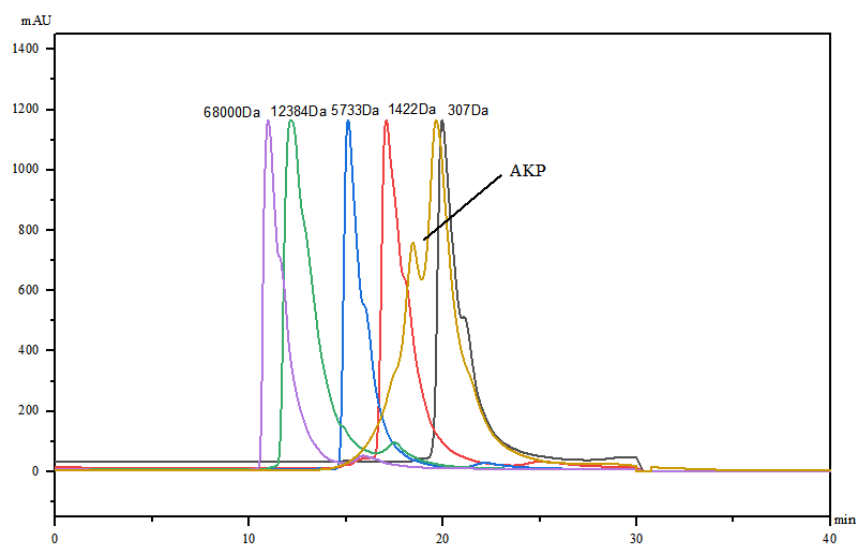

Supplementary Figure 1 Size distribution profiles of AKP and molecular weight standards (68000Da, 12384Da, 5733Da, 1422Da, and 307 Da).
