# Supplementary material for: Antarctic krill peptide alleviates liver fibrosis via downregulating the secondary bile acid mediated NLRP3 signaling pathway
Source: Royal Society of Chemistry journal article supplement (doi:10.1039/d1fo04241f), 2022-01-01
Supplement: d1fo04241f2.pdf [file d1fo04241f2.pdf]

**Supplementary Table 1 The amino acid compositions of AKP**

| Amino acid | mg/g protein | Amino acid         | mg/g protein |
|------------|--------------|--------------------|--------------|
| Asp        | 85.4         | EAA                | 318.4        |
| Thr        | 33.9         | NEAA               | 457.1        |
| Ser        | 32.1         | TAA                | 775.5        |
| Glu        | 122.9        | EAA/TAA (%)        | 41.1         |
| Gly        | 38.8         | EAA/NEAA (%)       | 69.7         |
| Ala        | 47.8         | HAA (%)            | 34.4         |
| Cys        | 5.1          | BCAA (%)           | 18.1         |
| Val        | 41.4         | BCAA/AAA (F value) | 2.44         |
| Met        | 4.1          |                    |              |
| Ile        | 37.3         |                    |              |
| Leu        | 61.3         |                    |              |
| Tyr        | 34.4         |                    |              |
| Phe        | 47.6         |                    |              |
| His        | 25.9         |                    |              |
| Lys        | 66.9         |                    |              |
| Arg        | 63.5         |                    |              |
| Pro        | 27.1         |                    |              |

**Supplementary Table 2. Detail of primers for quantitative fluorescence PCR**

| Gene           | Forward primer (5'-3')           | Reverse primer (5'-3')      |
|----------------|----------------------------------|-----------------------------|
| <i>Colla1</i>  | 5'-TGCTGGACGTCCTGGTGAAG          | 5'-ACGTTGTCCAGCAATACCCTGAG  |
| <i>Colla2</i>  | 5'-ACCCGATGGCAACAATGGA           | 5'-ACCAGCAGGGCCTTGTTTAC     |
| <i>β-actin</i> | 5'-AGCAACTAAACAACCTGCCAGTACTA-3' | 5'-CGATGGCTACCCTTTGCTTCT-3' |
